# Supplementary material
Source: MDPI journal article supplement (https://www.mdpi.com/2072-4292/13/3/453)
Supplement: s1 [file s1]

# Supplementary Materials: Accuracy Improvements to Pixel-Based and Object-Based LULC Classification with Auxiliary Datasets from Google Earth Engine

Le'an Qu, Zhenjie Chen, Manchun Li, Junjun Zhi and Huiming Wang

## 1. Relationships of land cover types in different land classification systems

**Table 1.** Relationships of land cover types in different land classification systems.

| Land Cover Class | MCD12Q1                                 | GlobCover 2009                                                                                                                                                      | Land Survey Data                                    |
|------------------|-----------------------------------------|---------------------------------------------------------------------------------------------------------------------------------------------------------------------|-----------------------------------------------------|
| Cultivated land  | 11 Post-flooding or irrigated croplands | 11 Post-flooding or irrigated croplands                                                                                                                             |                                                     |
|                  | 12 Croplands                            | 14 Rainfed croplands                                                                                                                                                |                                                     |
|                  | 14 Cropland/natural vegetation mosaic   | 20 Mosaic cropland (50–70%) / vegetation (grassland, shrubland, forest) (20–50%)<br>30 Mosaic vegetation (grassland, shrubland, forest) (50–70%)/ cropland (20–50%) | 11 irrigated croplands<br>12 nonirrigated croplands |
| Forest           | 1 Evergreen needleleaf forest           | 40 Closed to open (>15%) broadleaved evergreen and/or semi-deciduous forest (>5m)                                                                                   |                                                     |
|                  | 2 Evergreen broadleaf forest            | 50 Closed (>40%) broadleaved deciduous forest (>5m)                                                                                                                 | 21 forest                                           |
|                  | 3 Deciduous needleleaf forest           | 60 Open (15–40%) broadleaved deciduous forest (>5m)                                                                                                                 | 23 open forest                                      |
|                  | 4 Deciduous broadleaf forest            | 70 Closed (>40%) needleleaved evergreen forest (>5m)                                                                                                                | 24 other forest                                     |
|                  | 5 Mixed forest                          | 90 Open (15–40%) needleleaved deciduous or evergreen forest (>5m)                                                                                                   |                                                     |
| Grassland        | 8 Woody savannas                        | 110 Mosaic forest-shrubland (50–70%) / grassland (20–50%)                                                                                                           | 31 High coverage grassland (>50%)                   |
|                  | 9 Savannas                              | 120 Mosaic grassland (50–70%) / forest-shrubland (20–50%)                                                                                                           | 32 Medium coverage grassland (20%–50%)              |
|                  | 10 Grasslands                           | 140 Closed to open (>15%) grassland<br>150 Sparse (>15%) vegetation (woody vegetation, shrubs, grassland)                                                           | 33 Low coverage grassland (5%–20%)                  |

## 2. Scripts for image pre-processing

[https://code.earthengine.google.com/?accept\\_repo=users/qulean/Landsat8\\_preprocessing](https://code.earthengine.google.com/?accept_repo=users/qulean/Landsat8_preprocessing)

## 3. Scripts for training points selection

[https://code.earthengine.google.com/?accept\\_repo=users/qulean/samples](https://code.earthengine.google.com/?accept_repo=users/qulean/samples)

## 4. Scripts for image segmentation

[https://code.earthengine.google.com/?accept\\_repo=users/qulean/Segmentation](https://code.earthengine.google.com/?accept_repo=users/qulean/Segmentation)

## 5. Scripts for image classification, accuracy assessment and features' importance

[https://code.earthengine.google.com/?accept\\_repo=users/qulean/Classification](https://code.earthengine.google.com/?accept_repo=users/qulean/Classification)

## 6. Accuracy of pixel-based RF models

**Table S2.** Accuracy of M1–M7 RF models.

|                      | M1           |       | M2           |       | M3           |       | M4           |       | M5           |       | M6           |       | M7           |       |
|----------------------|--------------|-------|--------------|-------|--------------|-------|--------------|-------|--------------|-------|--------------|-------|--------------|-------|
|                      | UA           | PA    |
| <b>Cropland</b>      | 89.54        | 96.19 | 91.60        | 96.02 | 90.43        | 97.26 | 90.81        | 96.11 | 91.85        | 97.61 | 91.26        | 96.74 | 93.12        | 97.79 |
| <b>Grassland</b>     | 55.56        | 34.08 | 33.33        | 19.62 | 27.91        | 22.22 | 36.36        | 15.56 | 29.17        | 33.87 | 42.59        | 37.70 | 50.00        | 40.91 |
| <b>Woodland</b>      | 95.17        | 97.79 | 95.54        | 97.58 | 95.45        | 99.55 | 95.80        | 97.88 | 95.97        | 99.61 | 95.44        | 98.47 | 96.28        | 99.60 |
| <b>Water bodies</b>  | 95.58        | 89.64 | 95.86        | 93.04 | 96.89        | 91.22 | 94.57        | 96.14 | 96.02        | 96.44 | 95.68        | 89.89 | 96.60        | 95.99 |
| <b>Built-up land</b> | 75.32        | 60.10 | 78.30        | 69.53 | 76.41        | 59.90 | 81.56        | 61.33 | 84.46        | 60.53 | 80.43        | 69.58 | 84.11        | 68.53 |
| <b>kappa</b>         | <b>0.87</b>  |       | <b>0.89</b>  |       | <b>0.89</b>  |       | <b>0.89</b>  |       | <b>0.90</b>  |       | <b>0.89</b>  |       | <b>0.91</b>  |       |
| <b>OA</b>            | <b>91.51</b> |       | <b>92.73</b> |       | <b>92.36</b> |       | <b>92.62</b> |       | <b>93.53</b> |       | <b>92.73</b> |       | <b>94.20</b> |       |

Note: PA = producer's accuracy, UA = user's accuracy, OA = overall accuracy.

## 7. Accuracy of object-based RF models.

**Table S3.** Accuracy of M1'–M7' RF models.

|                      | M1'          |       | M2'          |       | M3'          |       | M4'          |       | M5'          |       | M6'          |       | M7'          |       |
|----------------------|--------------|-------|--------------|-------|--------------|-------|--------------|-------|--------------|-------|--------------|-------|--------------|-------|
|                      | UA           | PA    |
| <b>Cropland</b>      | 92.70        | 98.59 | 94.29        | 98.28 | 94.53        | 99.17 | 94.59        | 97.97 | 94.69        | 98.55 | 94.34        | 98.48 | 95.48        | 98.30 |
| <b>Grassland</b>     | 50.00        | 37.25 | 50.00        | 39.09 | 72.73        | 54.41 | 38.46        | 29.55 | 66.66        | 48.33 | 35.29        | 32.79 | 74.07        | 53.85 |
| <b>Woodland</b>      | 95.68        | 98.91 | 96.53        | 98.80 | 96.66        | 99.28 | 95.86        | 99.28 | 96.85        | 99.50 | 96.54        | 99.18 | 96.94        | 99.34 |
| <b>Water bodies</b>  | 97.16        | 91.53 | 95.92        | 93.55 | 98.39        | 95.61 | 96.25        | 94.38 | 96.73        | 93.88 | 97.03        | 91.48 | 97.99        | 96.17 |
| <b>Built-up land</b> | 86.31        | 74.86 | 87.71        | 78.92 | 93.82        | 81.59 | 90.91        | 81.84 | 89.04        | 78.86 | 87.98        | 84.51 | 89.32        | 85.95 |
| <b>kappa</b>         | <b>0.91</b>  |       | <b>0.92</b>  |       | <b>0.94</b>  |       | <b>0.92</b>  |       | <b>0.93</b>  |       | <b>0.92</b>  |       | <b>0.94</b>  |       |
| <b>OA</b>            | <b>94.03</b> |       | <b>94.67</b> |       | <b>95.73</b> |       | <b>94.91</b> |       | <b>95.27</b> |       | <b>94.95</b> |       | <b>96.01</b> |       |

Note: PA = producer's accuracy, UA = user's accuracy, OA = overall accuracy.

## 8. Classification results of pixel-based RF models.

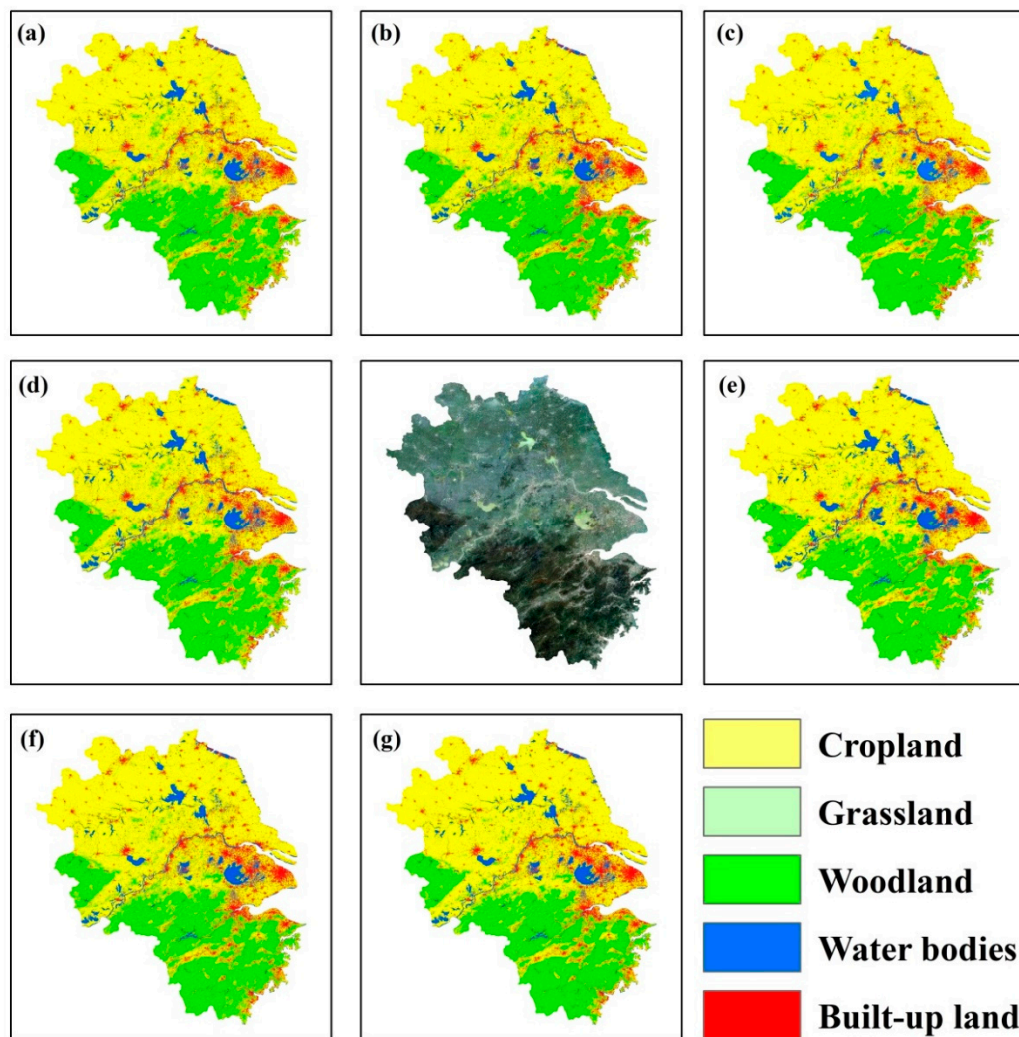

**Figure S1.** Comparison of pixel-based classification results: (a)–(g) indicate M1–M7 model, respectively.

#### 9. Classification results of object-based RF models.

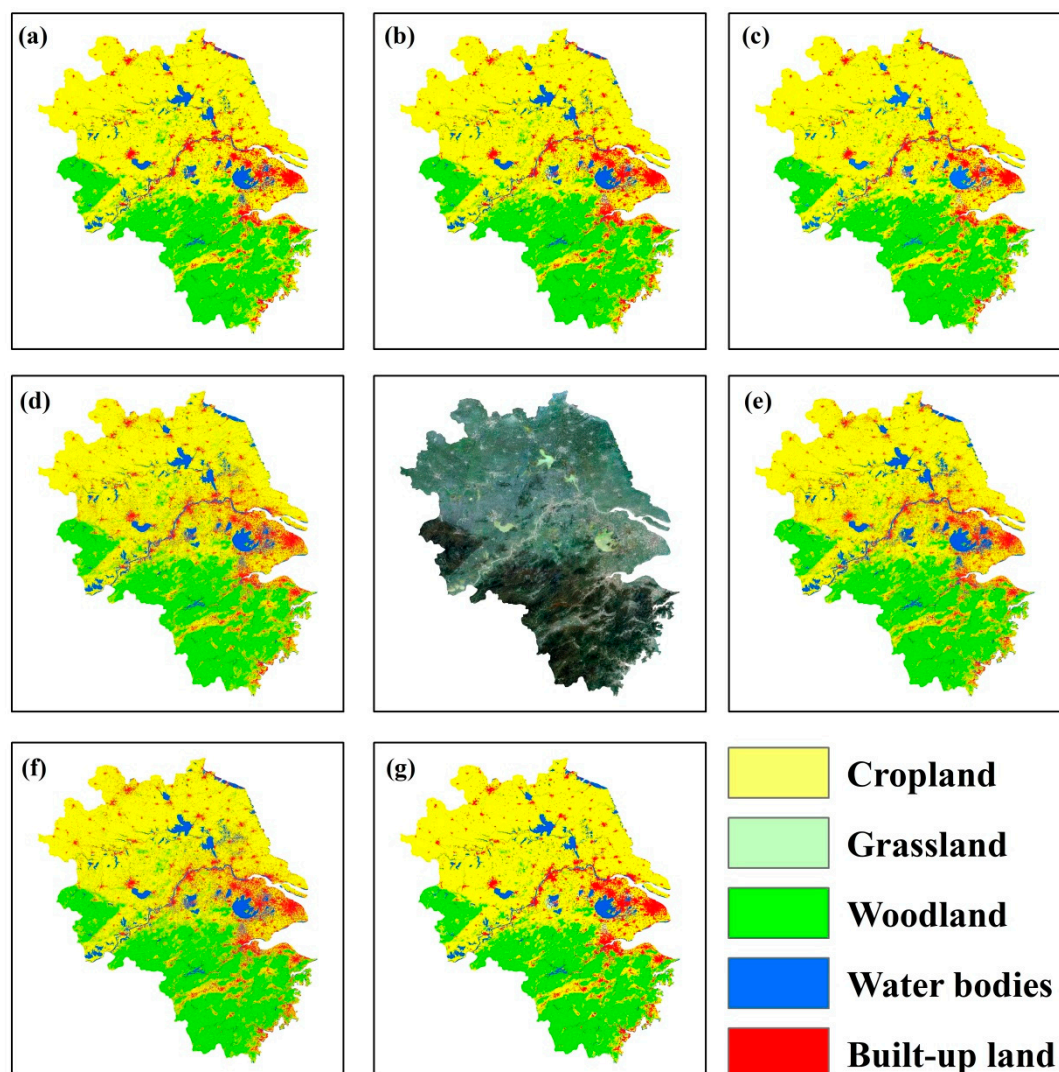

**Figure S2.** Comparison of object-based classification results: (a)–(g) indicate M1'–M7' model, respectively.

### 10. Classification results by the 10-fold cross-validation models.

We applied the k-fold cross-validation method to further analyze the stability and sensitivity of the RF classification models with k set to 10 according to the experience of previous research. As is shown in Table S4, the overall accuracy of the 10-fold cross-validation classification is similar to our previous RF models. The major reason for this result is that the sampling proportion significantly differs with the 10-fold cross-validation classification applying 90% of the total sample as training data while our previous RF models using 70%. The parameter settings of our 14 RF models are the same as the 10-fold cross-validation classification except for the percentage of training sample points. Results indicate that our previous RF models are as stable and robust as the 10-fold cross-validation.

**Table S4.** Classification results by the 10-fold cross-validation models.

| Auxiliary features used | 10-fold cross-validation models |              | RF models   |              |
|-------------------------|---------------------------------|--------------|-------------|--------------|
|                         | Pixel-based                     | Object-based | Pixel-based | Object-based |
| spectral features       | 91.63±0.25                      | 94.23±0.16   | 91.51       | 94.03        |
| spectral indices        | 92.38±0.23                      | 94.94±0.22   | 92.73       | 94.67        |
| topographic features    | 93.01±0.19                      | 95.49±0.17   | 92.36       | 95.73        |

|                           |            |            |       |       |
|---------------------------|------------|------------|-------|-------|
| distance to water bodies  | 92.33±0.23 | 94.82±0.20 | 92.62 | 94.91 |
| soil features             | 93.69±0.22 | 95.27±0.18 | 93.53 | 95.27 |
| spectral-temporal metrics | 92.74±0.16 | 95.05±0.19 | 92.73 | 94.95 |
| ALL                       | 94.02±0.28 | 95.93±0.21 | 94.20 | 96.01 |

Note that 10-fold cross-validation models results are mean overall accuracy with standard deviation, and RF models results are mean overall accuracy.

### 11. Time-costs of pixel- and object-based models

**Table S5.** Time-costs of pixel and object-based models.

|                                                              | Pixel-based      | Object-based     |
|--------------------------------------------------------------|------------------|------------------|
| Image Segmentation                                           | —                | About 2 hours    |
| Spectral Features Classification                             | About 17 minutes | About 30 minutes |
| Spectral features + Spectral index Classification            | About 24 minutes | About 33 minutes |
| Spectral features + Topographic features Classification      | About 18 minutes | About 30 minutes |
| Spectral features + Distance to water body Classification    | About 18 minutes | About 30 minutes |
| Spectral features + Soil features Classification             | About 24 minutes | About 33 minutes |
| Spectral features + Spectral-temporal metrics Classification | About 24 minutes | About 1 hour     |
| All features classification                                  | About 33 minutes | About 8 hours    |

Note that it is difficult to give an accurate time-cost because the time-cost varies in every run.
